# Supplementary material
Source: publisher figshare collection journal article supplement (https://acs.figshare.com/ndownloader/files/13535111)
Supplement: Supplementary file 1 [file 13535111]

## Supporting Information

# Controlled Construction of Cu(I) Sites within Confined Spaces via Host-Guest Redox: Highly Efficient Adsorbents for Selective CO Adsorption

*Yu-Xia Li,<sup>†</sup> Yu-Nong Ji,<sup>†</sup> Meng-Meng Jin,<sup>†</sup> Shi-Chao Qi,<sup>†</sup> Shuai-Shuai Li,<sup>†</sup> Ding-Ming Xue,<sup>†</sup>*

*Ming Bo Yue,<sup>‡</sup> Xiao-Qin Liu,<sup>\*,†</sup> and Lin-Bing Sun<sup>\*,†</sup>*

<sup>†</sup>State Key Laboratory of Materials-Oriented Chemical Engineering, Jiangsu National Synergetic Innovation Center for Advanced Materials (SICAM), College of Chemical Engineering, Nanjing Tech University, Nanjing 210009, China. <sup>‡</sup>School of Chemistry and Chemical Engineering, Qufu Normal University, Shandong, China

\*Corresponding author. E-mail: liuxq@njtech.edu.cn; lbsun@njtech.edu.cn.

## Contents

|                                                                                                               |      |
|---------------------------------------------------------------------------------------------------------------|------|
| Materials Characterization.....                                                                               | S-3  |
| Table S1 Structural properties and Cu contents of different samples.....                                      | S-5  |
| Table S2 Adsorption amount of CO for some typical adsorbents.....                                             | S-6  |
| Figure S1 SEM images of (A) MIL-100(Fe) and (B) Cu(I)MFe-3.....                                               | S-7  |
| Figure S2 TEM images of (A) MIL-100(Fe) and (B) Cu(I)MFe-3.....                                               | S-8  |
| Figure S3 FT-IR spectra of the samples MIL-100(Fe) and Cu <sup>+</sup> -containing MIL-100(Fe).....           | S-9  |
| Figure S4 N <sub>2</sub> adsorption isotherms of MIL-100(Fe) and Cu <sup>+</sup> -containing MIL-100(Fe)..... | S-11 |
| Figure S5 (A) TG and (B) DTG profiles of MIL-100(Fe) and Cu <sup>+</sup> -containing MIL-100(Fe).....         | S-12 |
| Figure S6 HAADF STEM and EDX mapping images of C, Fe, F, O, Cl, and Cu elements of the sample Cu(I)MFe-3..... | S-13 |
| Figure S7 DRIFT spectra of CO adsorbed at 298 K on Cu(II)MFe-3 and Cu(I)MFe-3.....                            | S-14 |
| Figure S8 CO isosteric heat of adsorption of different samples.....                                           | S-15 |
| Figure S9 Adsorption isotherms of CO on MIL-100(Fe) at 273 and 298 K.....                                     | S-16 |
| Figure S10 Adsorption isotherms of CO on Cu(I)MFe-3 at 273 and 298 K.....                                     | S-17 |
| Figure S11 Adsorption isotherms of CO on Cu(I)MFe-3-I at 273 and 298 K.....                                   | S-18 |
| Figure S12 Cycling adsorption of CO over the adsorbent Cu(I)MFe-3 at 298 K and 1 bar.....                     | S-19 |
| References.....                                                                                               | S-20 |

## Materials Characterization.

Powder X-ray diffraction (XRD) patterns of the samples were collected using a BRUKER D8 Advance diffractometer equipped with Cu K $\alpha$  radiation in the  $2\theta$  ranges from  $2^\circ$  to  $60^\circ$  at 40 kV and 30 mA. Morphologies of the materials were observed by field-emission scanning electron microscopy (FESEM; HITACHI S-4800). Transmission electron microscopy (TEM) was carried out on a JEM-200CX electron microscope at 200 kV. The N<sub>2</sub> adsorption isotherms were investigated from an ASAP 2020 system at  $-196^\circ\text{C}$ . Before the analysis, the samples (100 mg) were degassed at  $180^\circ\text{C}$  for 4 h under vacuum. The Brunauer–Emmett–Teller (BET) surface area was identified by relative pressure ranging from 0.04 to 0.20. The total pore volume was analyzed by the uptake at a relative pressure of about 0.99. Fourier transform infrared (FTIR) measurements were conducted on a Nicolet Nexus 470 spectrometer using the KBr pellet technique. The spectra were recorded with a  $2\text{ cm}^{-1}$  resolution. Adsorption of CO on adsorbents were investigated by low-pressure adsorption experiments monitored by Diffuse Reflectance Infrared Fourier Transform Spectroscopy (DRIFTS). The study was performed with a Nicolet NEXUS<sup>TM</sup> FT-IR spectrometer equipped with a liquid-nitrogen cooled MCT-A detector and an Ever-Glow mid-IR source and using a PIKE DiffuseIR<sup>TM</sup> diffuse reflectance accessory with a PIKE DiffuseIR<sup>TM</sup> high-temperature environmental chamber equipped with KBr windows. A home-built pressure control system employing a turbomolecular pump and an electronically actuated leaking-valve was connected to the chamber. It allowed evacuation of the measurement chamber to a base-pressure of  $2\times 10^{-6}$  mbar and adjustment of constant probe molecule pressure up to 100 mbar. Thermogravimetric (TG) analysis was performed on a thermobalance (STA-499C, NETZSCH) in N<sub>2</sub> atmosphere with a flow rate of  $10\text{ mL}\cdot\text{min}^{-1}$  and sample (5 mg) was heated from 30 to  $800^\circ\text{C}$  with a heating rate of  $10^\circ\text{C}\cdot\text{min}^{-1}$ . X-ray photoelectron spectroscopy (XPS) analysis was determined by a Physical Electronic PHI 550 spectrometer with an Al K $\alpha$  X-ray source (1486.6 eV). A wet chemistry titration method was applied to analyze the quantity of Fe<sup>2+</sup> content in the samples. In a typical process, sample (200 mg) was added into the H<sub>2</sub>O (50 mL) under continuous agitation. The consumption of ceric sulfate solution ( $0.1138\text{ mol}\cdot\text{L}^{-1}$ ) can quantify the amount of Fe<sup>2+</sup> by immediate titration, where phenanthroline was used as an indicator. A wet chemistry titration method was also applied to quantify of Cu<sup>+</sup> content in the samples. Prior to the titration test, the ferric chloride reagent

need to be prepared.  $\text{FeCl}_3$  (150 g) was dissolved in  $\text{HCl}$  (300 mL),  $\text{H}_2\text{O}$  (800 mL), and  $\text{H}_2\text{O}_2$  (10 mL) and then the solution was heated till boiling for removing excess  $\text{H}_2\text{O}_2$ . After dropping to room temperature, a ferric chloride reagent can be obtained. Sample (200 mg) was added into the reagent (10 mL) under continuous agitation.  $\text{Cu}^{2+}$  and  $\text{Fe}^{2+}$  were produced by the reaction between  $\text{Cu}^+$  with  $\text{Fe}^{3+}$ . Then,  $\text{H}_2\text{O}$  (50 mL) was added to the mixture. The consumption of ceric sulfate solution ( $0.1138 \text{ mol}\cdot\text{L}^{-1}$ ) can quantify the total amount of  $\text{Fe}^{2+}$  by immediate titration, where phenanthroline was used as an indicator. The consumption of ceric sulfate solution minus the quantity of  $\text{Fe}^{2+}$  content is the quantity of  $\text{Cu}^+$  content.

**Table S1** Structural properties and Cu contents of different samples

| Sample       | $S_{\text{BET}}$ ( $\text{m}^2 \cdot \text{g}^{-1}$ ) | $V_{\text{p}}$ ( $\text{cm}^3 \cdot \text{g}^{-1}$ ) | $\text{Cu}^+$ yield (%) |
|--------------|-------------------------------------------------------|------------------------------------------------------|-------------------------|
| MIL-100(Fe)  | 2023                                                  | 0.94                                                 | –                       |
| Cu(I)MFe-1   | 1531                                                  | 0.82                                                 | 99.1                    |
| Cu(I)MFe-2   | 1185                                                  | 0.75                                                 | 99.4                    |
| Cu(I)MFe-3   | 1067                                                  | 0.65                                                 | 99.6                    |
| Cu(I)MFe-4   | 924                                                   | 0.63                                                 | 99.5                    |
| Cu(I)MFe-3-I | 988                                                   | 0.46                                                 | 99.3                    |

**Table S2** Adsorption amount of CO for some typical adsorbents

| Adsorbent                             | <i>T</i><br>(K) | <i>P</i><br>(bar) | Adsorbed amount<br>(mmol·g <sup>-1</sup> ) | CO/N <sub>2</sub> Selectivity<br>(IAST <sup>a</sup> / Equilibrium) | Ref.      |
|---------------------------------------|-----------------|-------------------|--------------------------------------------|--------------------------------------------------------------------|-----------|
| Cu(I)MFe-3                            | 298             | 1                 | 3.75                                       | 424/31                                                             | This work |
| AC                                    | 303             | 1                 | 0.39                                       | −/1.2                                                              | 1         |
| Zeolite 13X                           | 293             | 1                 | 0.99                                       | −/2.8                                                              | 2         |
| Zeolite 5A                            | 303             | 1                 | 1.0                                        | −/2.0                                                              | 1,3       |
| ZSM-5                                 | 303             | 1                 | 0.17                                       | −/1.1                                                              | 4         |
| MIL-101(Cr)                           | 288             | 1                 | 1.13                                       | −/3.7                                                              | 5         |
| MIL-125-NH <sub>2</sub>               | 303             | 1                 | 0.15                                       | −/0.94                                                             | 6         |
| UTSA-16                               | 298             | 1                 | 0.11                                       | −/0.44                                                             | 7         |
| Cu-BTC                                | 295             | 1                 | 0.8                                        | −/2.0                                                              | 8         |
| MIL-100(Fe)                           | 298             | 1                 | 0.38                                       | 0.1/1.5                                                            | 9         |
| CuCl/AC                               | 298             | 1                 | 2.5                                        | 45/14                                                              | 10        |
| CuCl/γ-Al <sub>2</sub> O <sub>3</sub> | 303             | 2                 | 1.0                                        | −/−                                                                | 3         |
| CuCl/NaY                              | 303             | 0.7               | 2.3                                        | −/2.8                                                              | 11        |
| CuCl/Y                                | 303             | 1                 | 2.67                                       | −/26                                                               | 12        |
| CuZSM-5                               | 303             | 1                 | 0.11                                       | −/−                                                                | 13        |
| CuCl/Polystyrene Resin                | 293             | 1                 | 0.94                                       | −/6.0                                                              | 14        |
| Cu <sub>2</sub> O-modified SBA-15     | 298             | 1                 | 0.48                                       | −/6.7                                                              | 15        |
| CuCl/SBA-15                           | 308             | 1                 | 0.50                                       | −/−                                                                | 16        |
| CuCl/MCM-41                           | 308             | 1                 | 0.57                                       | −/−                                                                | 16        |
| Cu(I)@MIL-100(Fe)                     | 298             | 1                 | 2.78                                       | 280/4.3                                                            | 9         |

<sup>a</sup> IAST selectivity at the CO:N<sub>2</sub> ratio of 0.33.

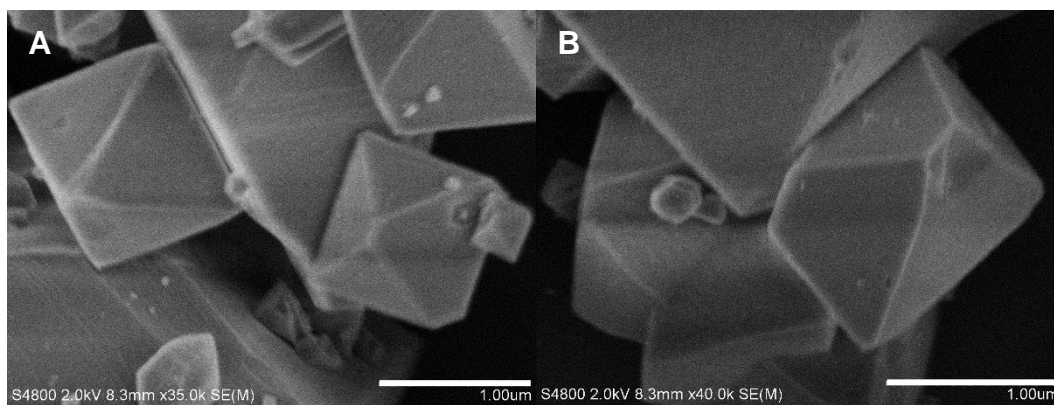

**Figure S1.** SEM images of (A) MIL-100(Fe) and (B) Cu(I)MFe-3. Scale bars represent 1  $\mu\text{m}$ .

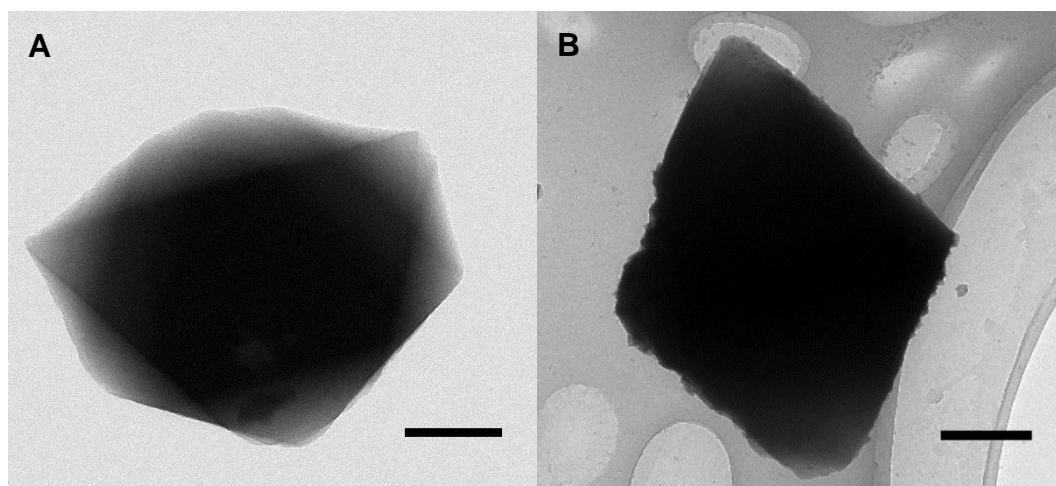

**Figure S2.** TEM images of (A) MIL-100(Fe) and (B) Cu(I)MFe-3. Scale bars represent 200 nm.



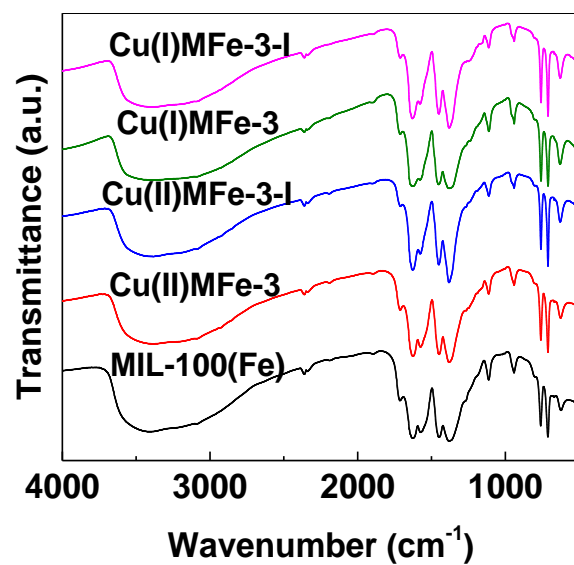

**Figure S3.** FT-IR spectra of the samples MIL-100(Fe) and Cu<sup>+</sup>-containing MIL-100(Fe).

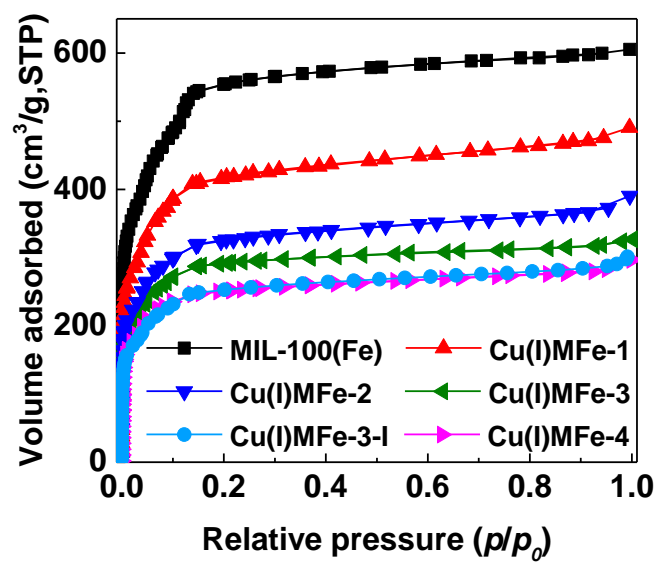

**Figure S4.** N<sub>2</sub> adsorption isotherms of MIL-100(Fe) and Cu<sup>+</sup>-containing MIL-100(Fe).

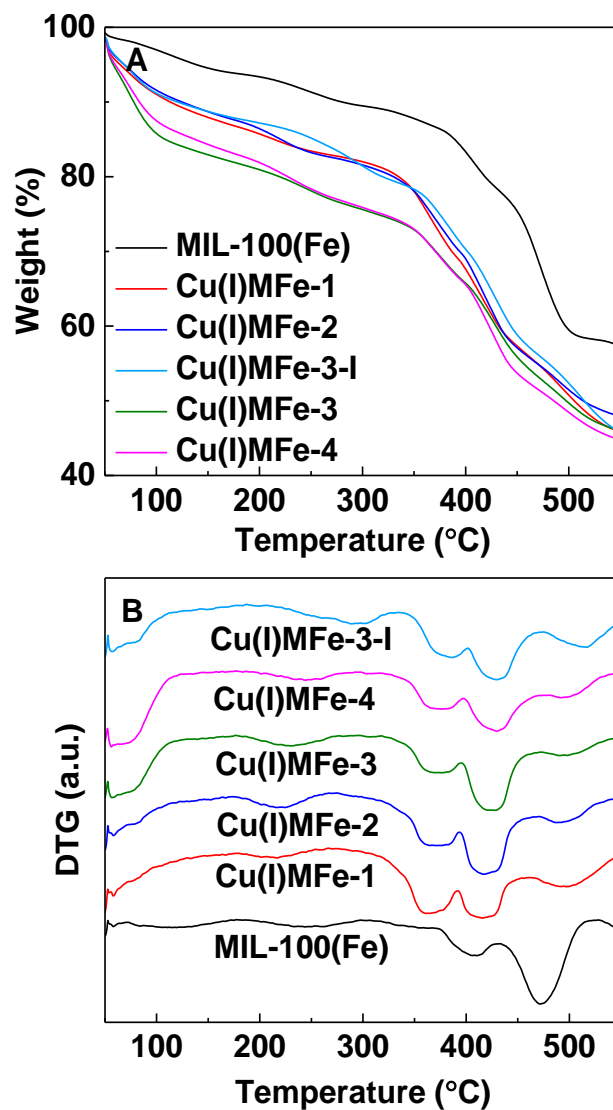

**Figure S5.** (A) TG and (B) DTG profiles of MIL-100(Fe) and Cu<sup>+</sup>-containing MIL-100(Fe). DTG curves are plotted offset for clarity.

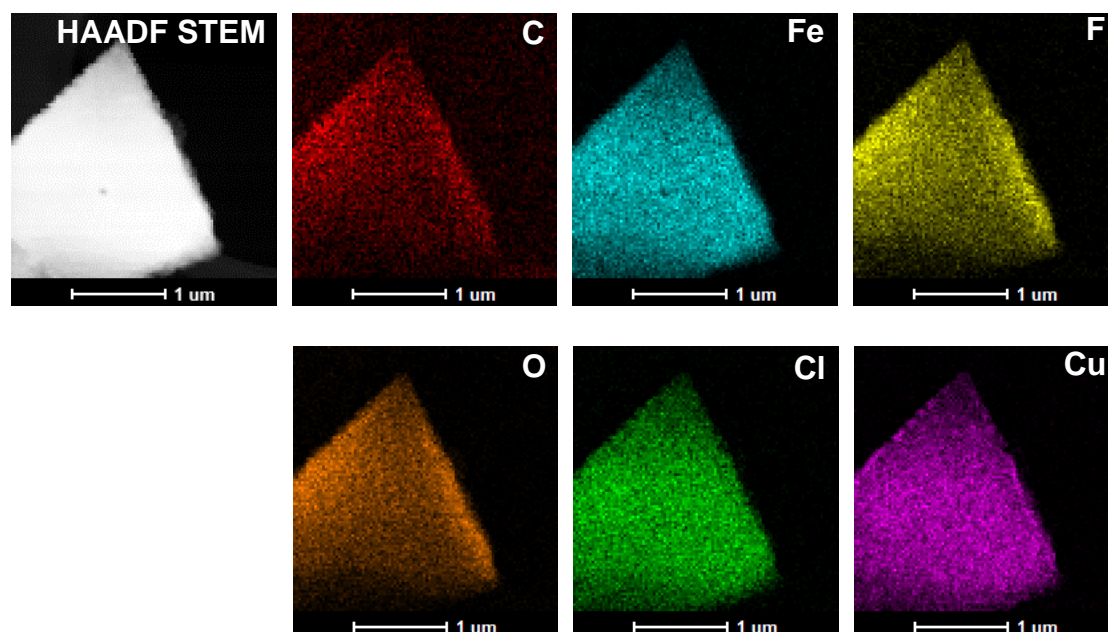

**Figure S6.** HAADF STEM and EDX mapping images of C, Fe, F, O, Cl, and Cu elements of the sample Cu(I)MFe-3.

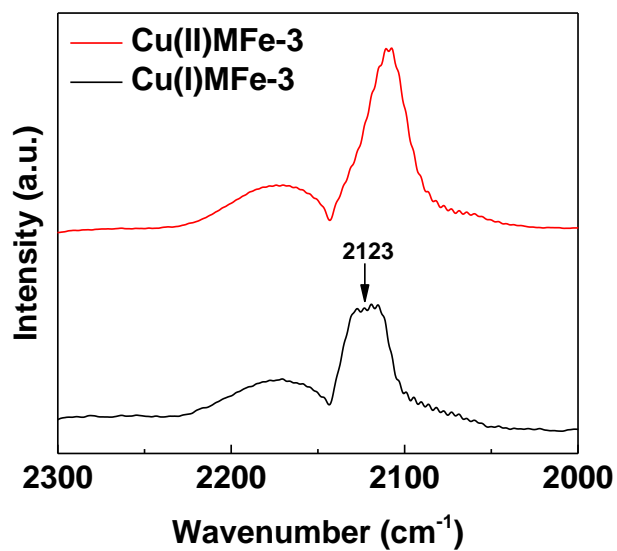

**Figure S7.** DRIFT spectra of CO adsorbed at 298 K on Cu(II)MFe-3 and Cu(I)MFe-3.

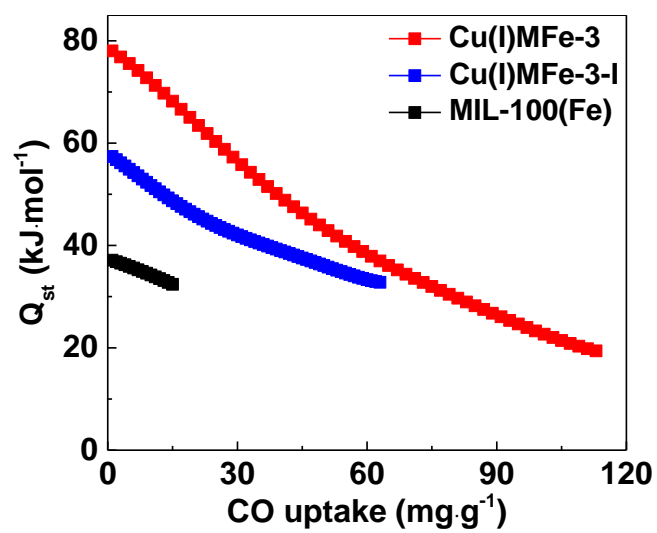

**Figure S8.** CO isosteric heat of adsorption of different samples.

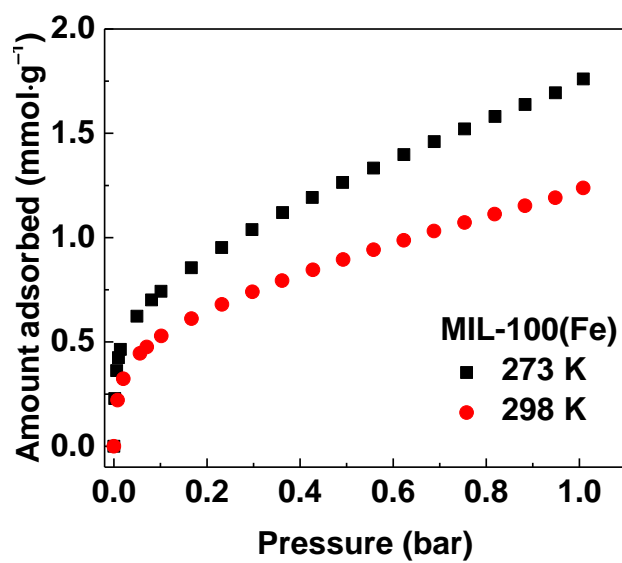

**Figure S9.** Adsorption isotherms of CO on MIL-100(Fe) at 273 and 298 K.

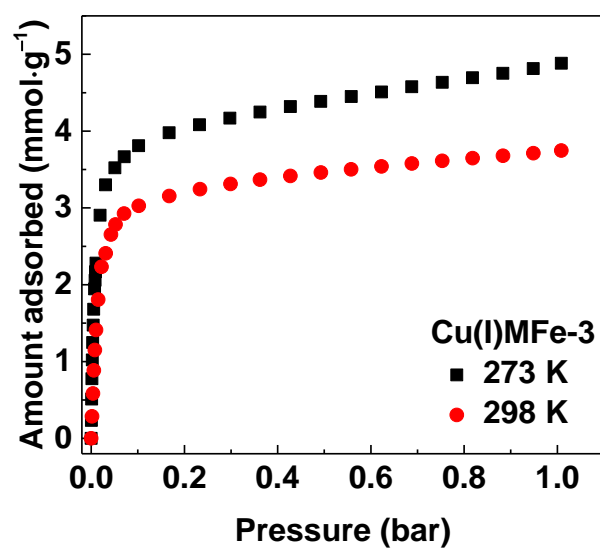

**Figure S10.** Adsorption isotherms of CO on Cu(I)MFe-3 at 273 and 298 K.



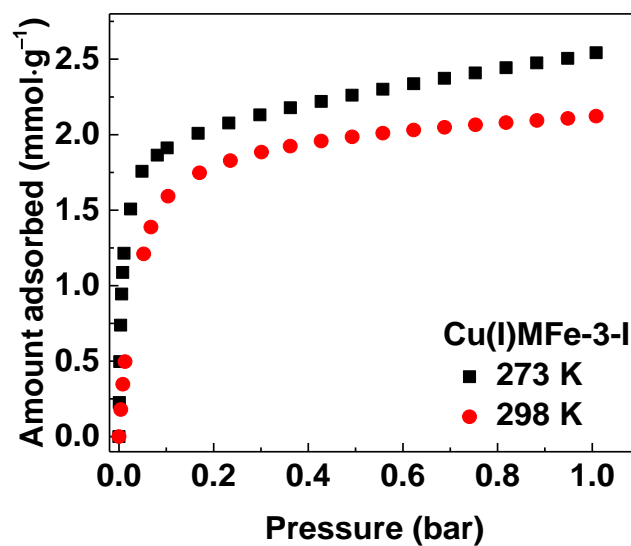

**Figure S11.** Adsorption isotherms of CO on Cu(I)MFe-3-I at 273 and 298 K.

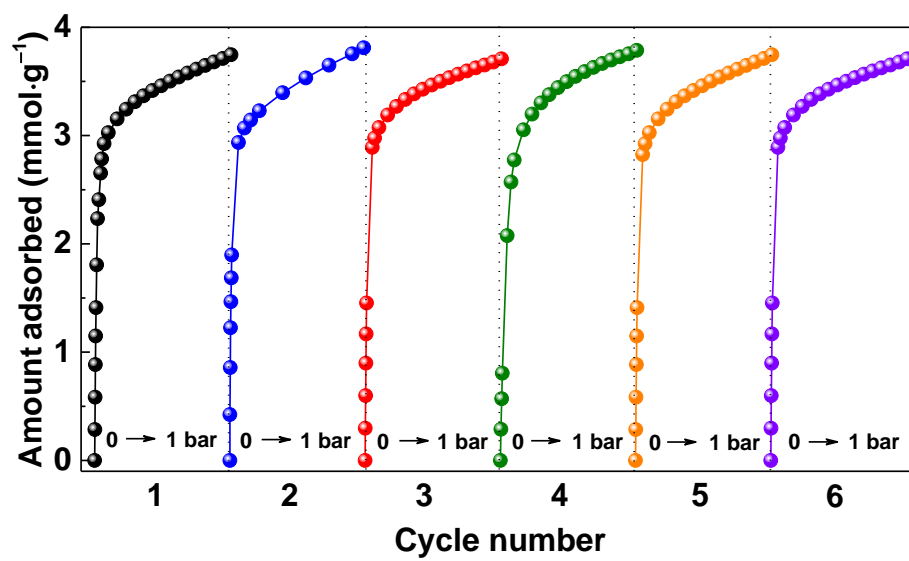

**Figure S12.** Cycling adsorption of CO over the adsorbent Cu(I)MFe-3 at 298 K and 1 bar.

## References

- (1) Sievers, W.; Mersmann, A. Single and Multicomponent Adsorption Equilibria of Carbon Dioxide, Nitrogen, Carbon Monoxide and Methane in Hydrogen Purification Processes *Chem. Eng. Technol.* **1994**, *17*, 325.
- (2) Park, Y.; Ju, Y.; Park, D.; Lee, C. H. Adsorption Equilibria and Kinetics of Six Pure Gases on Pelletized Zeolite 13X up to 1.0 MPa: CO<sub>2</sub>, CO, N<sub>2</sub>, CH<sub>4</sub>, Ar and H<sub>2</sub>. *Chem. Eng. J.* **2016**, *292*, 348.
- (3) Saha, D.; Deng, S. G. Adsorption Equilibria and Kinetics of Carbon Monoxide on Zeolite 5A, 13X, MOF-5, and MOF-177. *J. Chem. Eng. Data* **2009**, *54*, 2245.
- (4) Heymans, N.; Alban, B.; Moreau, S.; De Weireld, G. Experimental and Theoretical Study of the Adsorption of Pure Molecules and Binary Systems Containing Methane, Carbon Monoxide, Carbon Dioxide and Nitrogen. Application to the Syngas Generation. *Chem. Eng. Sci.* **2011**, *66*, 3850.
- (5) Munusamy, K.; Sethia, G.; Patil, D. V.; Rallapalli, P. B. S.; Somani, R. S.; Bajaj, H. C. Sorption of Carbon Dioxide, Methane, Nitrogen and Carbon Monoxide on MIL-101(Cr): Volumetric Measurements and Dynamic Adsorption Studies. *Chem. Eng. J.* **2012**, *195*, 359.
- (6) Regufe, M. J.; Tarnajon, J.; Ribeiro, A. M.; Ferreira, A.; Lee, U. H.; Hwang, Y. K.; Chang, J. S.; Serre, C.; Loureiro, J. M.; Rodrigues, A. E. Syngas Purification by Porous Amino-Functionalized Titanium Terephthalate MIL-125. *Energy Fuels* **2015**, *29*, 4654.
- (7) Agueda, V. I.; Delgado, J. A.; Uguina, M. A.; Brea, P.; Spjelkavik, A. I.; Blom, R.; Grande, C. Adsorption and Diffusion of H<sub>2</sub>, N<sub>2</sub>, CO, CH<sub>4</sub> and CO<sub>2</sub> in UTSA-16 Metal-Organic Framework Extrudates. *Chem. Eng. Sci.* **2015**, *124*, 159.
- (8) Wang, Q. M.; Shen, D. M.; Bulow, M.; Lau, M. L.; Deng, S. G.; Fitch, F. R.; Lemcoff, N. O.; Semancin, J. Metallo-Organic Molecular Sieve for Gas Separation and Purification. *Microporous Mesoporous Mater.* **2002**, *55*, 217.
- (9) Peng, J.; Xian, S.; Xiao, J.; Huang, Y.; Xia, Q.; Wang, H.; Li, Z. A Supported Cu(I)@MIL-100(Fe) Adsorbent with High CO Adsorption Capacity and CO/N<sub>2</sub>

Selectivity. *Chem. Eng. J.* **2015**, 270, 282.

(10) Ma, J. H.; Li, L.; Ren, J.; Li, R. F. CO Adsorption on Activated Carbon-Supported Cu-Based Adsorbent Prepared by a Facile Route. *Sep. Purif. Technol.* **2010**, 76, 89.

(11) Xie, Y. C.; Zhang, J. P.; Qiu, J. G.; Tong, X. Z.; Fu, J. P.; Yang, G.; Yan, H. J.; Tang, Y. Q. Zeolites Modified by CuCl for Separating CO from Gas Mixtures Containing CO<sub>2</sub>. *Adsorption* **1996**, 3, 27.

(12) Gao, F.; Wang, Y.; Wang, S. Selective Adsorption of CO on CuCl/Y Adsorbent Prepared Using CuCl<sub>2</sub> as Precursor: Equilibrium and Thermodynamics. *Chem. Eng. J.* **2016**, 290, 418.

(13) Rakic, V.; Rac, V.; Dondur, V.; Auroux, A. Competitive Adsorption of N<sub>2</sub>O and CO on CuZSM-5, FeZSM-5, CoZSM-5 and Bimetallic Forms of ZSM-5 Zeolite. *Catal. Today* **2005**, 110, 272.

(14) Hirai, H.; Wada, K.; Kurima, K.; Komiyama, M. Carbon Monoxide Adsorbent Composed of Copper(I) Chloride and Polystyrene Resin Having Amino Groups. *Bull. Chem. Soc. Jpn.* **1986**, 59, 2553.

(15) Yin, Y.; Tan, P.; Liu, X.-Q.; Zhu, J.; Sun, L.-B. Constructing a Confined Space in Silica Nanopores: an ideal Platform for the Formation and Dispersion of Cuprous Sites. *J. Mater. Chem. A* **2014**, 2, 3399.

(16) Wang, Y.; Yang, R. T.; Heinzl, J. M. Desulfurization of Jet Fuel by  $\pi$ -Complexation Adsorption with Metal Halides Supported on MCM-41 and SBA-15 Mesoporous Materials. *Chem. Eng. Sci.* **2008**, 63, 356.
